# Supplementary material
Source: MDPI journal article supplement (https://www.mdpi.com/2313-0105/9/5/283)
Supplement: s1 [file s1]

Supporting information

**Prefabrication of lithium fluoride interfacial layer to Enable Dendrite-Free Lithium Deposition**

**Jie Ni <sup>1</sup>, Yike Lei <sup>1</sup>, Yongkang Han <sup>1</sup>, Yingchuan Zhang <sup>1</sup>, Cunman Zhang <sup>1</sup>, Zhen Geng <sup>1,\*</sup>, and Qiangfeng Xiao <sup>1,\*</sup>**

School of Automotive Studies & Clean Energy Automotive Engineering Center,  
Tongji University (Jiading Campus), Shanghai 201804, China

\*Correspondence: zgeng@tongji.edu.cn; xiaoqf@ tongji.edu.cn

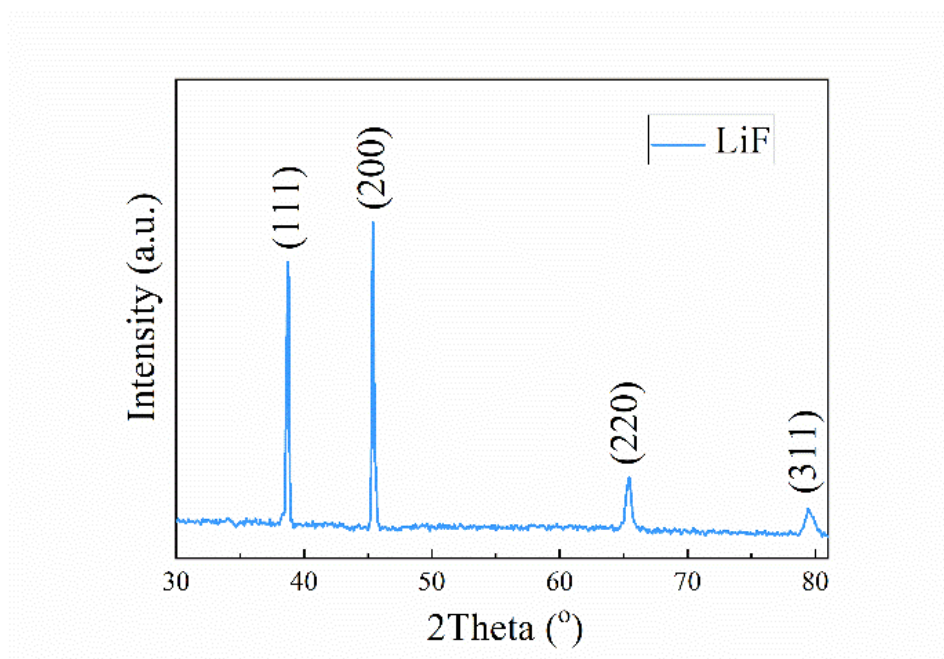

**Figure S1.** The XRD pattern of LiF-coated Li metal

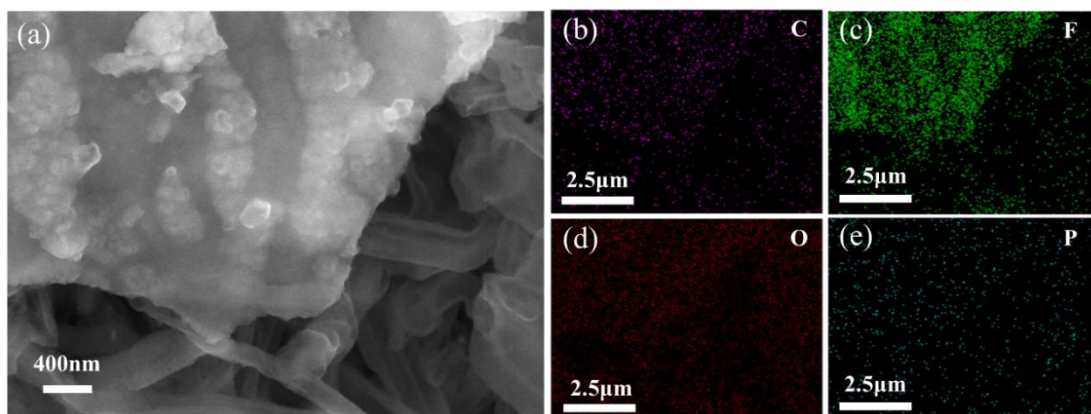

**Figure S2.** The (a)SEM image and (b–e) EDS mapping images of LiF-Cu electrode

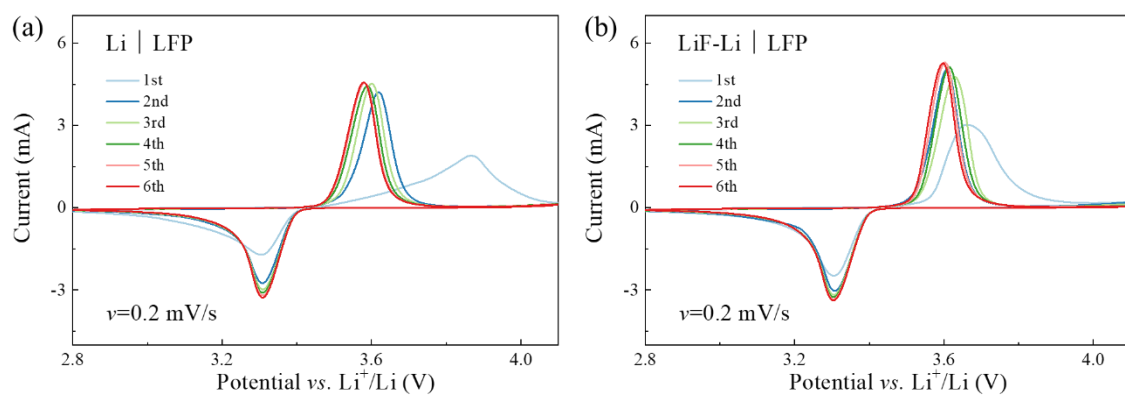

**Figure S3.** The CV curves of (a) Li | LFP cells, (b) LiF-Li | LFP cells during the first six charge-discharge cycles

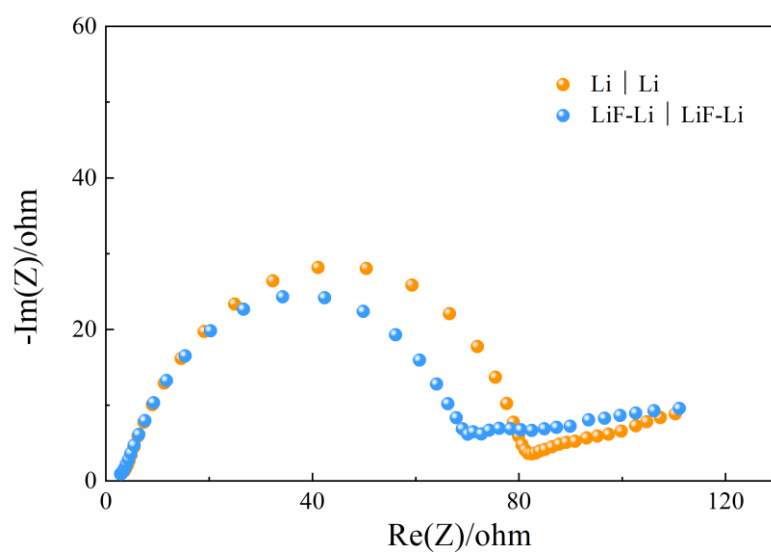

**Figure S4.** Electrochemical impedance spectra (EIS) of Li|Li cells after the 1st cycle.

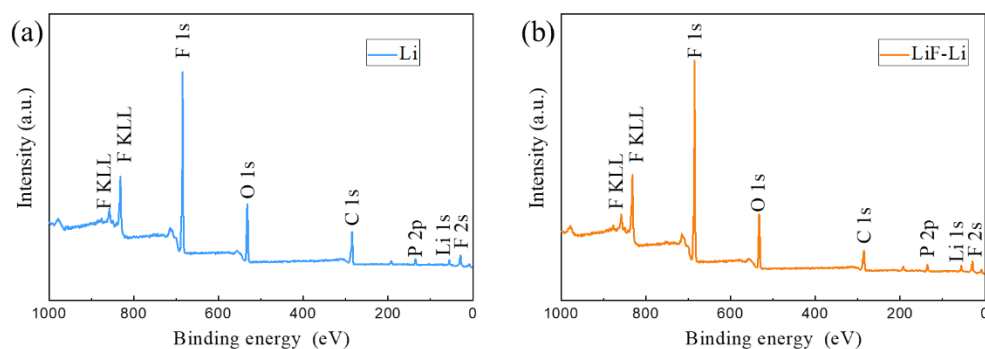

**Figure S5.** The XPS survey spectra of lithium metal anode surface after 100 cycles at 1C from (a) Li | LFP cell and (b) LiF-Li | LFP cell

**Table S1.** Atomic percent of lithium metal anode surface after 100 cycles at 1C from Li | LFP cell and LiF-Li | LFP cell.

| Name  | Li   LFP % | LiF-Li   LFP % |
|-------|------------|----------------|
| F 1s  | 29.95      | 33.9           |
| C 1s  | 21.29      | 16.52          |
| P 2p  | 2.39       | 2.85           |
| Li 1s | 31.91      | 32.87          |
| O 1s  | 14.16      | 13.87          |
